# Supplementary material for: Relevance of Plasma Homocysteine and Methylenetetrahydrofolate Reductase 677TT Genotype in Sickle Cell Disease: A Systematic Review and Meta-Analysis
Source: MDPI journal article supplement (doi:10.3390/ijms232314641), 2022-11-24
Supplement: s1 [file s1]

# Relevance of Plasma Homocysteine and Methylenetetrahydrofolate Reductase 677TT Genotype in Sickle Cell Disease: A Systematic Review and Meta-Analysis

Paul R. J. Ames, Alessia Arcaro, Matilde Caruso, Maria Graf, Vincenzo Marottoli and Fabrizio Gentile

## Supplementary Material

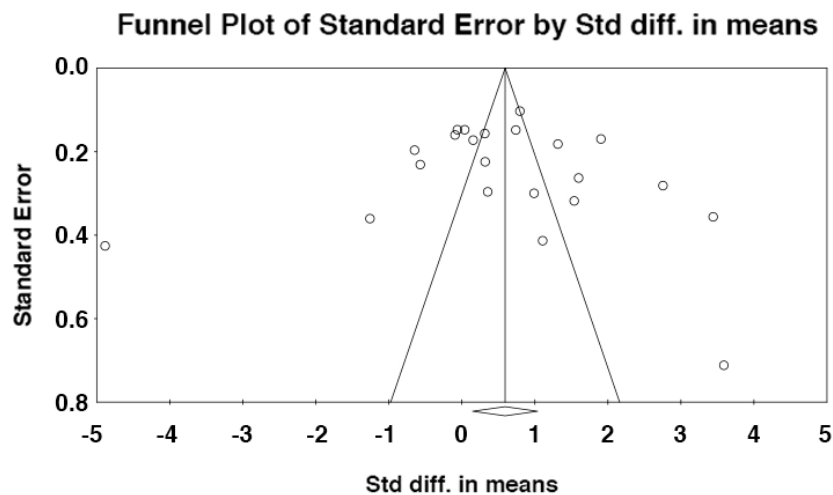

Figure S1. Funnel plot showing a non-significant asymmetry according to the Begg and Mazumdar Rank Correlation Test (Kendall's tau 0.07792, 1-tailed  $p$ -value of 0.30588) and by Egger's Test of the Intercept (Intercept 0.63946, 95% confidence interval (-5.48829, 6.76720), with  $t=0.21768$ ; 1-tailed  $p$ -value 0.41494)

## Plasma homocysteine in sickle cell disease

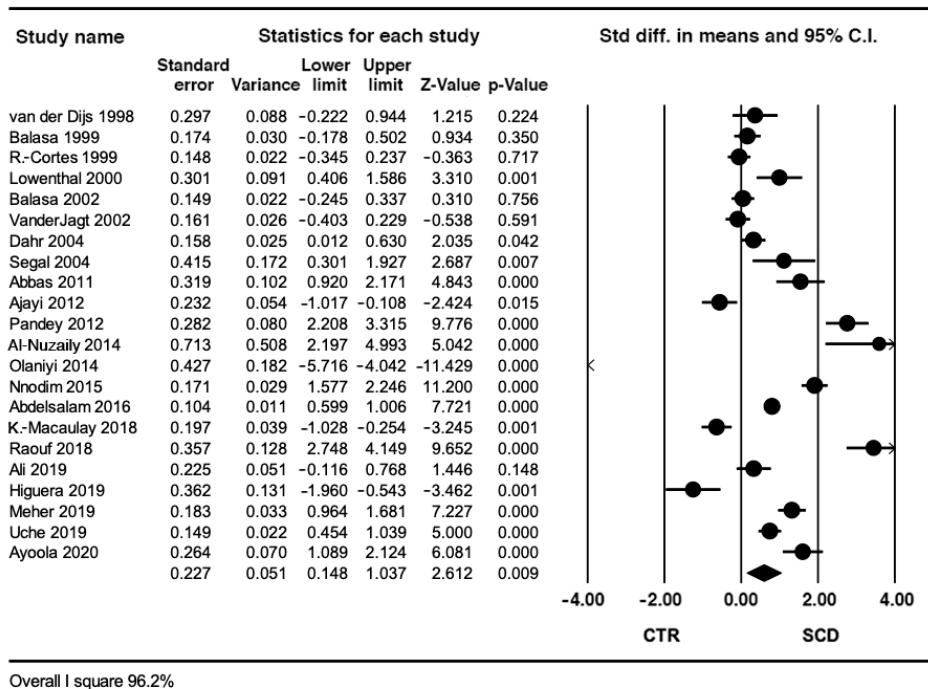

Figure S2. Effect size of studies comparing plasma homocysteine in control (CTR) and sickle cell disease (SCD).

### Plasma homocysteine by vaso-occlusive crisis

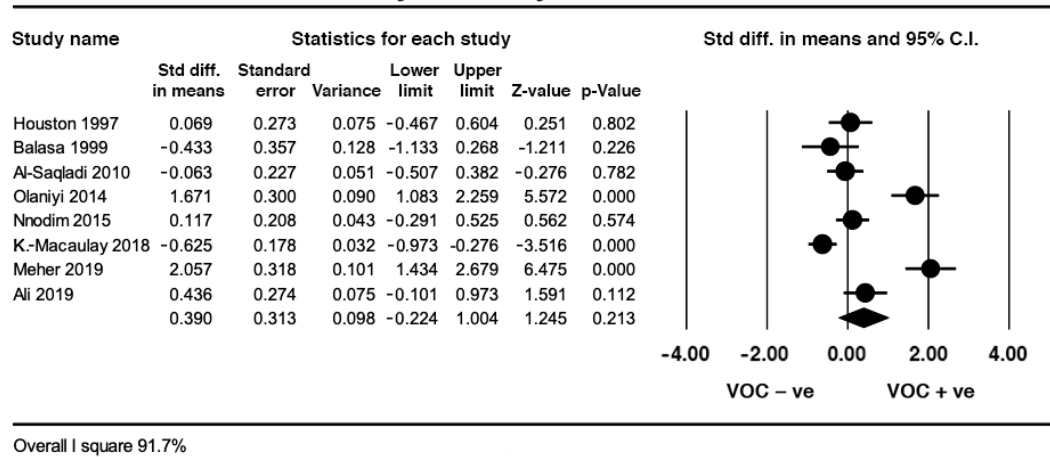

Figure S3A. Effect size of studies comparing plasma homocysteine in patients in and out vaso-occlusive crisis (VOC).

### Plasma homocysteine by vaso-occlusive crisis

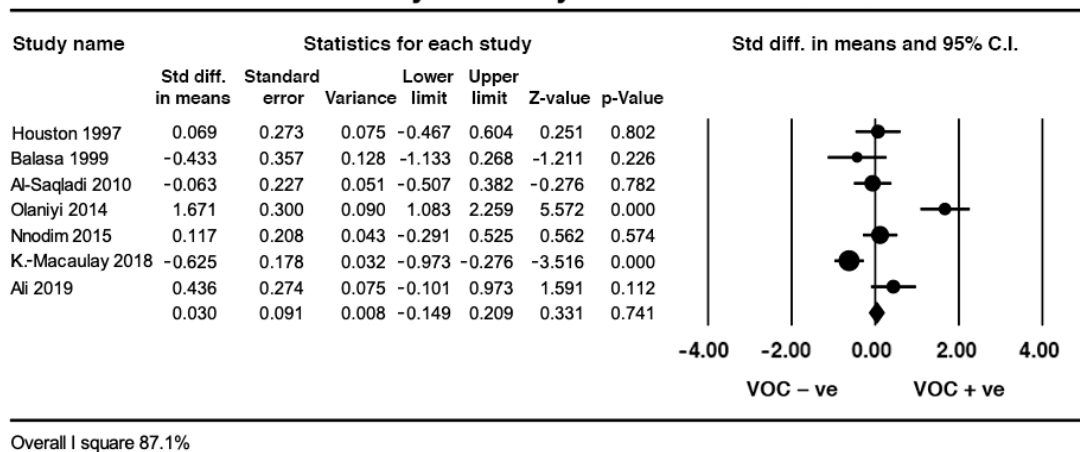

Figure S3B. Effect size of studies comparing plasma homocysteine in patients out and in vaso-occlusive crisis (VOC) excluding one study from India (Meher 2019).

### Plasma homocysteine by vaso-occlusive crisis

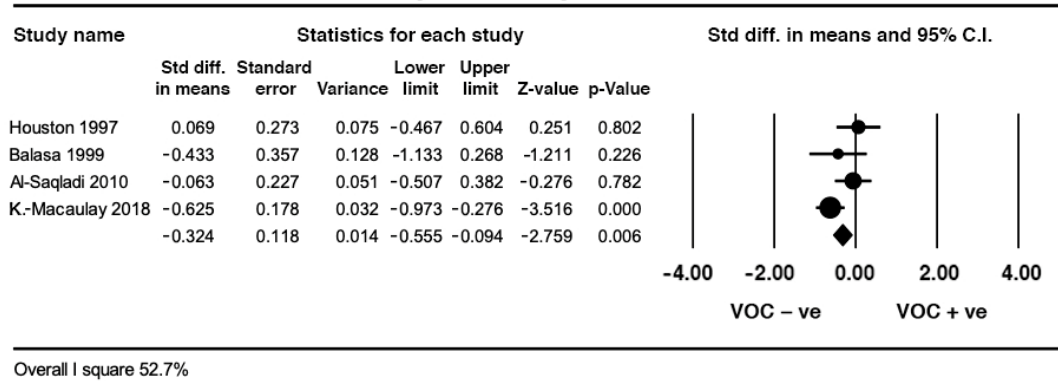

Figure S3C. Effect size of studies comparing plasma homocysteine in patients out and in vaso-occlusive crisis (VOC) excluding one study from India (Meher 2019) and three studies from Nigeria (Olaniyi 2014, Nnodim 2015, Ali 2019)

### Methylenetetrahydrofolate reductase 1298CC in sickle cell disease

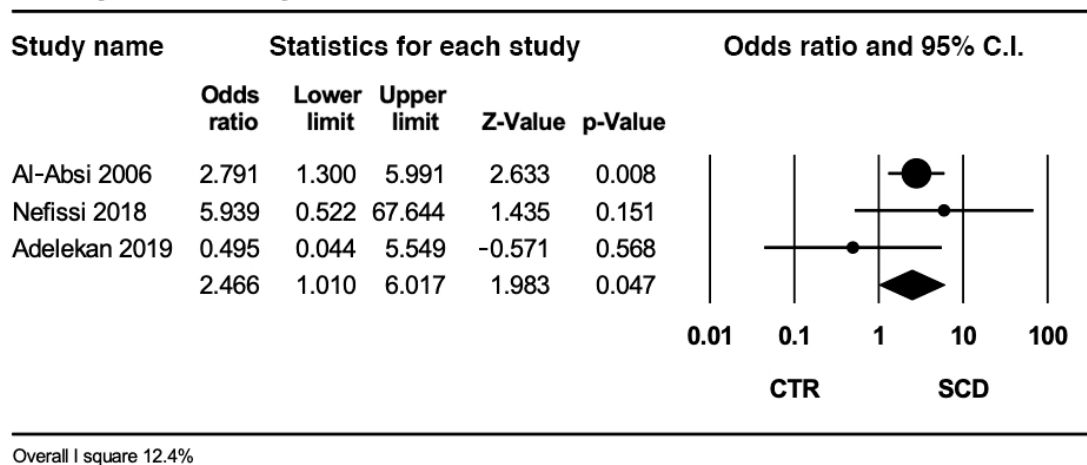

Figure S4. Effect size of the pooled prevalence of the methylenetetrahydrofolate reductase 1298CC in controls (CTR) and in sickle cell disease (SCD).
